# Supplementary material for: First observation of light-induced spin change in vacuum deposited thin films of iron spin crossover complexes
Source: Royal Society of Chemistry journal article supplement (doi:10.1039/c1dt10651a), 2011-01-01
Supplement: c1dt10651a.pdf [file c1dt10651a.pdf]

† Electronic Supplementary Information (ESI)

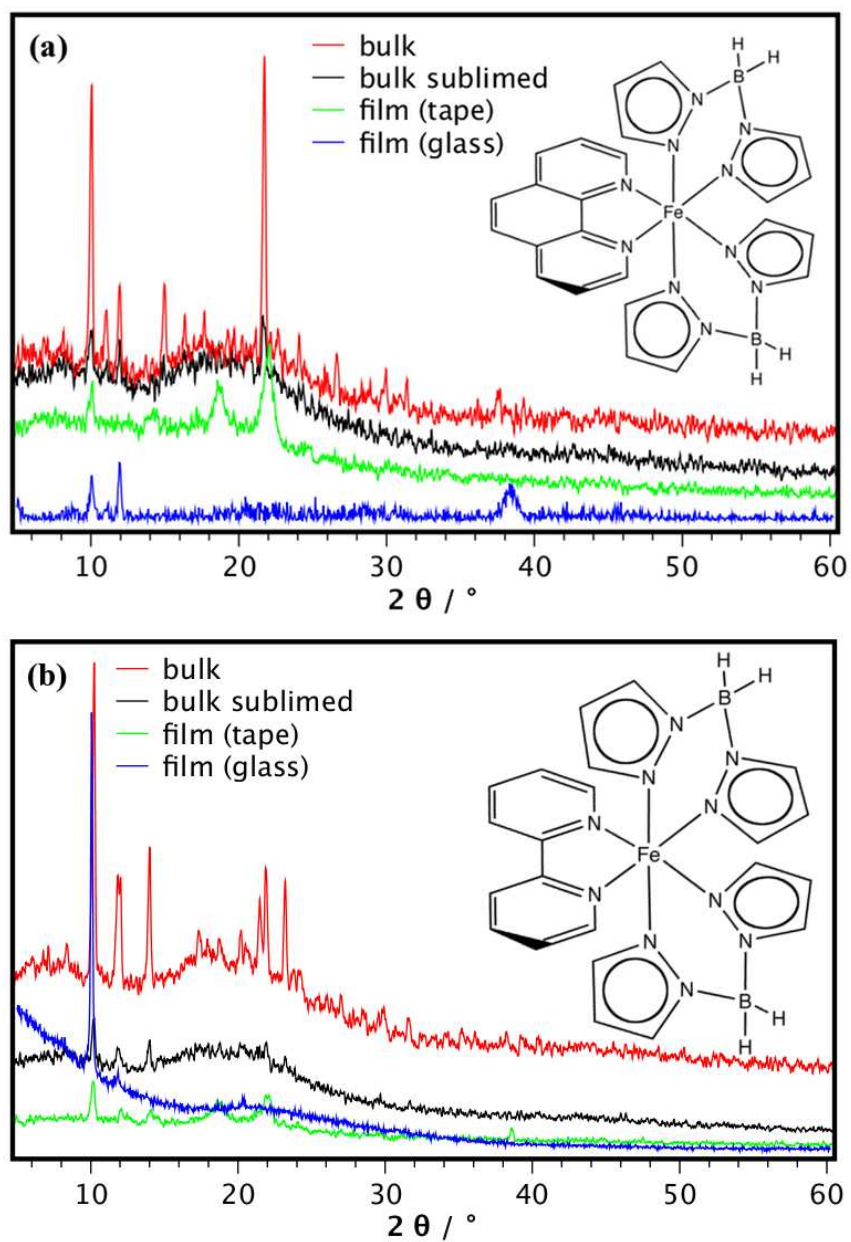

Fig. S1 X-ray-diffractograms of bulk, sublimed bulk, film on tape and film on glas for 1 and 2.

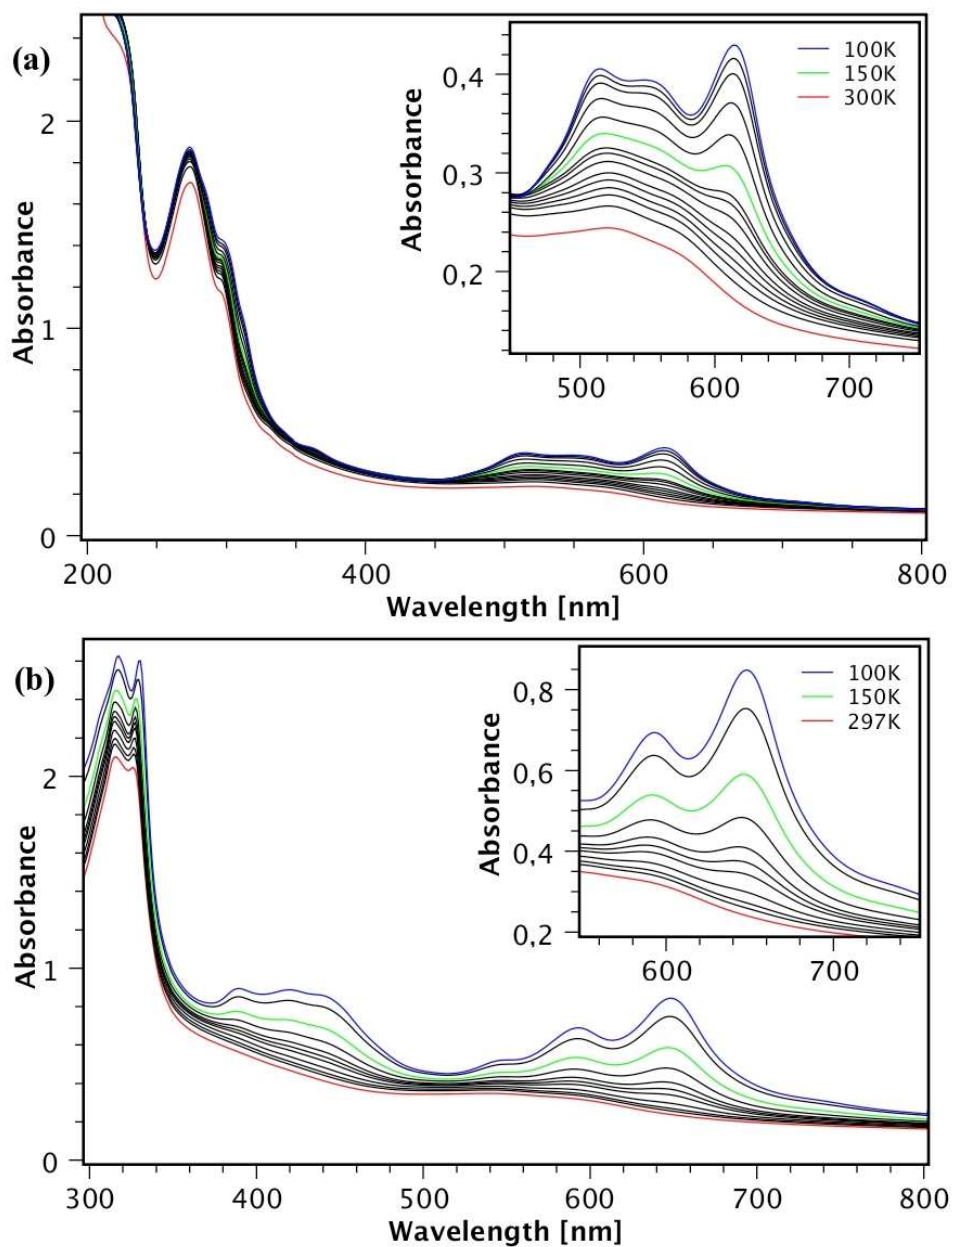

Fig. S2 UV/Vis Spectra of KBr pellets of 1 and 2.

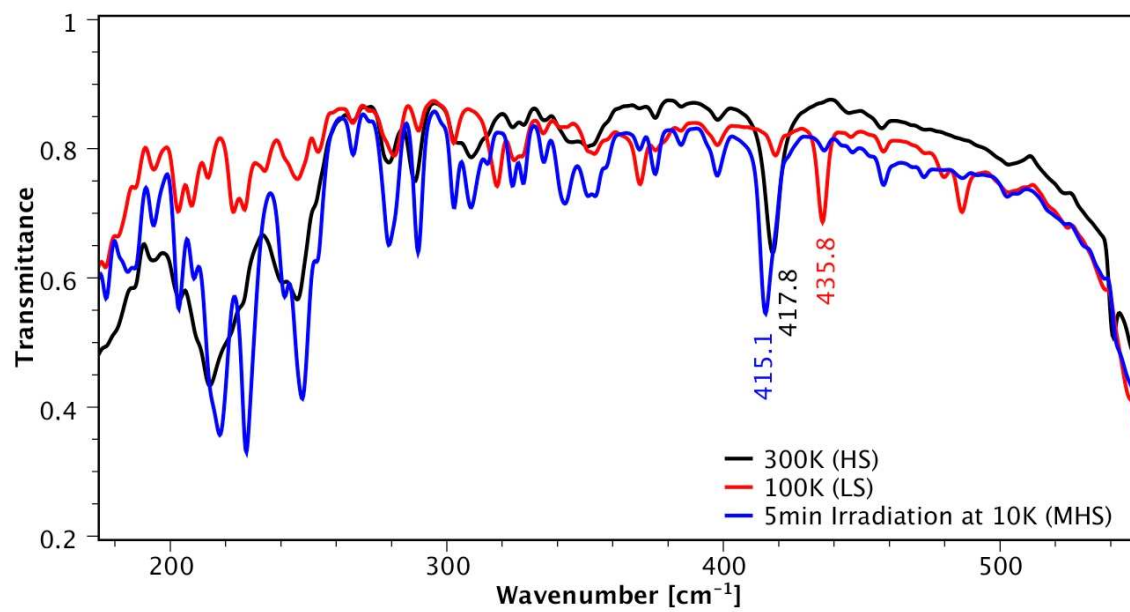

**Fig. S3** FIR Spectra of a thin film of **2** at 300 and 10 K.
